# Supplementary material for: Augmenting the Transplant Team With Artificial Intelligence: Toward Meaningful AI Use in Solid Organ Transplant
Source: Frontiers journal article supplement (doi:10.3389/fimmu.2021.694222), 2021-06-11
Supplement: Table_1.XLSX [file Table_1.XLSX]

## Sheet: PubMed_TransplantAI
General Information										Challenges and Limitations of AI												Accuracy and Effectiveness Measures Reported																	AI Methods Employed
Title	Authors	Citation	Journal/Book	Publication Year	Create Date	Article Type	DOI	Field	Problem/Prediction	Data availability: Collection and Measurement Techniques	Data availability: Generalizable	Data availability: Missingness			Clinical Decision: Interpretability/Black Box	Clinical Decision: Skills	Acceptance: Ethics and Guidelines	Acceptance: Validation/Approval	Acceptance: Vested Interests	Acceptance: Accuracy Evaluation and Model Selection	N/A	ROC AUC	F1	C-statistic	Brier Score	Accuracy	Sensitivity	Specificity	Precision	Recall	PPV	NPV	Cost	Custom	None Reported	RMSE	R^2	Other	Neural Network	Gradient Boosting	Decision Tree	Random Forest	SVM	LASSO or Ridge Regression	Logistic Reg	kNN	Cluster Analysis	Adaboost	Naïve Bayes
Artificial intelligence and machine learning in nephropathology	Becker JU, Mayerich D, Padmanabhan M, Barratt J, Ernst A, Boor P, Cicalese PA, Mohan C, Nguyen HV, Roysam B.	Kidney Int. 2020 Jul;98(1):65-75. doi: 10.1016/j.kint.2020.02.027. Epub 2020 Apr 1.	Kidney Int	2020	2020-06-02	Review	10.1016/j.kint.2020.02.027	Kidney Transplant	n/a	X						X
Machine-learning algorithms for predicting results in liver transplantation: the problem of donor-recipient matching	Briceño J, Ayllón MD, Ciria R.	Curr Opin Organ Transplant. 2020 Aug;25(4):406-411. doi: 10.1097/MOT.0000000000000781.	Curr Opin Organ Transplant	2020	2020-06-04	Review	10.1097/MOT.0000000000000781	Liver Transplant	n/a						X
Artificial intelligence and organ transplantation: challenges and expectations	Briceño J.	Curr Opin Organ Transplant. 2020 Aug;25(4):393-398. doi: 10.1097/MOT.0000000000000775.	Curr Opin Organ Transplant	2020	2020-06-04	Review	10.1097/MOT.0000000000000775	General	n/a												X
Using Artificial Intelligence Resources in Dialysis and Kidney Transplant Patients: A Literature Review	Burlacu A, Iftene A, Jugrin D, Popa IV, Lupu PM, Vlad C, Covic A.	Biomed Res Int. 2020 Jun 10;2020:9867872. doi: 10.1155/2020/9867872. eCollection 2020.	Biomed Res Int	2020	2020-06-30	Review	10.1155/2020/9867872	Kidney Transplant	n/a									X	X
The Future Role of Machine Learning in Clinical Transplantation	Connor KL, O'Sullivan ED, Marson LP, Wigmore SJ, Harrison EM.	Transplantation. 2020 Aug 18. doi: 10.1097/TP.0000000000003424. Online ahead of print.	Transplantation	2020	2020-08-23	Review	10.1097/TP.0000000000003424	General	n/a	X	X				X		X	X
Prediction modeling-part 2: using machine learning strategies to improve transplantation outcomes	Coorey CP, Sharma A, Muller S, Yang JYH.	Kidney Int. 2020 Sep 8:S0085-2538(20)31073-5. doi: 10.1016/j.kint.2020.08.026. Online ahead of print.	Kidney Int	2020	2020-09-11	Review	10.1016/j.kint.2020.08.026	Kidney Transplant	n/a		X	X							X
Investigating the use of data-driven artificial intelligence in computerised decision support systems for health and social care: A systematic review	Cresswell K, Callaghan M, Khan S, Sheikh Z, Mozaffar H, Sheikh A.	Health Informatics J. 2020 Sep;26(3):2138-2147. doi: 10.1177/1460458219900452. Epub 2020 Jan 22.	Health Informatics J	2020	2020-01-23	Review	10.1177/1460458219900452	General	n/a							X	X	X
Application of Artificial Intelligence Techniques to Predict Survival in Kidney Transplantation: A Review	Díez-Sanmartín C, Sarasa Cabezuelo A.	J Clin Med. 2020 Feb 19;9(2):572. doi: 10.3390/jcm9020572.	J Clin Med	2020	2020-02-26	Review	10.3390/jcm9020572	Kidney Transplant	n/a						X
A Primer on Machine Learning	Edwards AS, Kaplan B, Jie T.	Transplantation. 2020 Aug 18. doi: 10.1097/TP.0000000000003316. Online ahead of print.	Transplantation	2020	2020-08-23	Review	10.1097/TP.0000000000003316		n/a		X				X
Artificial Intelligence and Algorithmic Computational Pathology: Introduction with Renal Allograft Examples	Farris AB, Vizcarra J, Amgad M, Cooper LAD, Gutman D, Hogan J.	Histopathology. 2020 Nov 19. doi: 10.1111/his.14304. Online ahead of print.	Histopathology	2020	2020-11-19	Review	10.1111/his.14304	Kidney Transplant	n/a									X
Recent advances in precision medicine for individualized immunosuppression	Fu S, Zarrinpar A.	Curr Opin Organ Transplant. 2020 Aug;25(4):420-425. doi: 10.1097/MOT.0000000000000771.	Curr Opin Organ Transplant	2020	2020-06-11	Review	10.1097/MOT.0000000000000771	General	n/a												X
Machine learning methods in organ transplantation	Guijo-Rubio D, Gutiérrez PA, Hervás-Martínez C.	Curr Opin Organ Transplant. 2020 Aug;25(4):399-405. doi: 10.1097/MOT.0000000000000774.	Curr Opin Organ Transplant	2020	2020-07-04	Review	10.1097/MOT.0000000000000774	General	n/a		X
Machine learning for predicting long-term kidney allograft survival: a scoping review	Sekercioglu N, Fu R, Kim SJ, Mitsakakis N.	Ir J Med Sci. 2020 Aug 6. doi: 10.1007/s11845-020-02332-1. Online ahead of print.	Ir J Med Sci	2020	2020-08-08	Review	10.1007/s11845-020-02332-1	Kidney Transplant	n/a	X	X	X						X		X
Applying Machine Learning in Liver Disease and Transplantation: A Comprehensive Review	Spann A, Yasodhara A, Kang J, Watt K, Wang B, Goldenberg A, Bhat M.	Hepatology. 2020 Mar;71(3):1093-1105. doi: 10.1002/hep.31103. Epub 2020 Mar 6.	Hepatology	2020	2020-01-08	Review	10.1002/hep.31103	Liver Transplant	n/a		X				X					X
Recent Advances and Clinical Outcomes of Kidney Transplantation	Thongprayoon C, Hansrivijit P, Leeaphorn N, Acharya P, Torres-Ortiz A, Kaewput W, Kovvuru K, Kanduri SR, Bathini T, Cheungpasitporn W.	J Clin Med. 2020 Apr 22;9(4):1193. doi: 10.3390/jcm9041193.	J Clin Med	2020	2020-04-26	Review	10.3390/jcm9041193	Kidney Transplant	n/a												X
Promises of Big Data and Artificial Intelligence in Nephrology and Transplantation	Thongprayoon C, Kaewput W, Kovvuru K, Hansrivijit P, Kanduri SR, Bathini T, Chewcharat A, Leeaphorn N, Gonzalez-Suarez ML, Cheungpasitporn W.	J Clin Med. 2020 Apr 13;9(4):1107. doi: 10.3390/jcm9041107.	J Clin Med	2020	2020-04-17	Review	10.3390/jcm9041107	Kidney Transplant	n/a												X
Using Artificial Intelligence for Predicting Survival of Individual Grafts in Liver Transplantation: A Systematic Review	Wingfield LR, Ceresa C, Thorogood S, Fleuriot J, Knight S.	Liver Transpl. 2020 Jul;26(7):922-934. doi: 10.1002/lt.25772. Epub 2020 Jun 23.	Liver Transpl	2020	2020-04-11	Review	10.1002/lt.25772	Liver Transplant	n/a		X				X		X
Machine learning in liver transplantation: a tool for some unsolved questions?	Ferrarese A, Sartori G, Orrù G, Frigo AC, Pelizzaro F, Burra P, Senzolo M.	Transpl Int. 2021 Jan 11. doi: 10.1111/tri.13818. Online ahead of print.	Transpl Int	2021	2021-01-11	Review	10.1111/tri.13818	Liver Transplant	n/a		X				X		X
Scientific Relief: when science and technology agree and lead	Khan MQ, Watt KD.	Liver Transpl. 2021 Jan 31. doi: 10.1002/lt.25998. Online ahead of print.	Liver Transpl	2021	2021-02-01	Review	10.1002/lt.25998	Liver Transplant	n/a		X
Advances in personalized medicine and noninvasive diagnostics in solid organ transplantation	Maldonado AQ, West-Thielke P, Joyal K, Rogers C.	Pharmacotherapy. 2021 Jan;41(1):132-143. doi: 10.1002/phar.2484. Epub 2021 Feb 4.	Pharmacotherapy	2021	2020-11-06	Review	10.1002/phar.2484	General	n/a		X							X
Development and future deployment of a 5 years allograft survival model for kidney transplantation	DuBay DA, Su Z, Morinelli TA, Baliga P, Rohan V, Bian J, Northrup D, Pilch N, Rao V, Srinivas TR, Mauldin PD, Taber DJ.	Nephrology (Carlton). 2019 Aug;24(8):855-862. doi: 10.1111/nep.13488. Epub 2019 Apr 30.	Nephrology (Carlton)	2019	2018-09-11	Study	10.1111/nep.13488	Kidney Transplant	Predict graft loss		X											X		X
Machine learning helps predict long-term mortality and graft failure in patients undergoing heart transplant	Agasthi P, Buras MR, Smith SD, Golafshar MA, Mookadam F, Anand S, Rosenthal JL, Hardaway BW, DeValeria P, Arsanjani R.	Gen Thorac Cardiovasc Surg. 2020 Dec;68(12):1369-1376. doi: 10.1007/s11748-020-01375-6. Epub 2020 May 7.	Gen Thorac Cardiovasc Surg	2020	2020-05-09	Study	10.1007/s11748-020-01375-6	Heart transplant	predict survival and graft failure (GF) 5 years after orthotopic heart transplant (OHT)		X											X					X	X			X	X								X
Machine learning to predict transplant outcomes: helpful or hype? A national cohort study	Bae S, Massie AB, Caffo BS, Jackson KR, Segev DL.	Transpl Int. 2020 Nov;33(11):1472-1480. doi: 10.1111/tri.13695. Epub 2020 Jul 28.	Transpl Int	2020	2020-09-30	Study	10.1111/tri.13695	Solid Organ Transplant	Outcome (rejection)		X				X					X				X	X															X		X			X
Dyspnea, effort and muscle pain during exercise in lung transplant recipients: an analysis of their association with cardiopulmonary function parameters using machine learning	Braccioni F, Bottigliengo D, Ermolao A, Schiavon M, Loy M, Marchi MR, Gregori D, Rea F, Vianello A.	Respir Res. 2020 Oct 15;21(1):267. doi: 10.1186/s12931-020-01535-5.	Respir Res	2020	2020-10-16	Study	10.1186/s12931-020-01535-5	Lung Transplant	Predicting dyspnea, muscle pain, muscle effort after lung transplantation		X																								X							X
A novel random forest integrative approach based on endogenous CYP3A4 phenotype for predicting tacrolimus concentrations and dosages in Chinese renal transplant patients	Cai N, Zhang X, Zheng C, Zhu L, Zhu M, Cheng Z, Luo X.	J Clin Pharm Ther. 2020 Apr;45(2):318-323. doi: 10.1111/jcpt.13074. Epub 2019 Nov 13.	J Clin Pharm Ther	2020	2019-11-14	Study	10.1111/jcpt.13074	Kidney transplant	Predicting tacrolimus concentration and dosage												X															X	X	X				X
Circulating extracellular vesicles as non-invasive biomarker of rejection in heart transplant	Castellani C, Burrello J, Fedrigo M, Burrello A, Bolis S, Di Silvestre D, Tona F, Bottio T, Biemmi V, Toscano G, Gerosa G, Thiene G, Basso C, Longnus SL, Vassalli G, Angelini A, Barile L.	J Heart Lung Transplant. 2020 Oct;39(10):1136-1148. doi: 10.1016/j.healun.2020.06.011. Epub 2020 Jun 20.	J Heart Lung Transplant	2020	2020-07-16	Study	10.1016/j.healun.2020.06.011	Heart transplant	predicting rejection based on presence of extracellular vesicles		X											X				X																X
Use of Artificial Intelligence as an Innovative Method for Liver Graft Macrosteatosis Assessment	Cesaretti M, Brustia R, Goumard C, Cauchy F, Poté N, Dondero F, Paugam-Burtz C, Durand F, Paradis V, Diaspro A, Mattos L, Scatton O, Soubrane O, Moccia S.	Liver Transpl. 2020 Oct;26(10):1224-1232. doi: 10.1002/lt.25801.	Liver Transpl	2020	2020-05-20	Study	10.1002/lt.25801	Liver Transplant	Assessing suitability of potential liver		X									X						X			X	X									X				X
The impact of deceased donor maintenance on delayed kidney allograft function: A machine learning analysis	Costa SD, de Andrade LGM, Barroso FVC, Oliveira CMC, Daher EF, Fernandes PFCBC, Esmeraldo RM, Sandes-Freitas TV.	PLoS One. 2020 Feb 6;15(2):e0228597. doi: 10.1371/journal.pone.0228597. eCollection 2020.	PLoS One	2020	2020-02-07	Study	10.1371/journal.pone.0228597	Kidney Transplant	Predicting DGF		X											X																	X		X		X	X	X	X
Improved cardiovascular risk prediction in patients with end-stage renal disease on hemodialysis using machine learning modeling and circulating microribonucleic acids	de Gonzalo-Calvo D, Martínez-Camblor P, Bär C, Duarte K, Girerd N, Fellström B, Schmieder RE, Jardine AG, Massy ZA, Holdaas H, Rossignol P, Zannad F, Thum T.	Theranostics. 2020 Jul 9;10(19):8665-8676. doi: 10.7150/thno.46123. eCollection 2020.	Theranostics	2020	2020-08-06	Study	10.7150/thno.46123	Kidney ESRD	Predicting cardiovascular death, nonfatal myocardial infarction or nonfatal stroke									X				X																			X
Using machine learning models to predict the initiation of renal replacement therapy among chronic kidney disease patients	Dovgan E, Gradišek A, Luštrek M, Uddin M, Nursetyo AA, Annavarajula SK, Li YC, Syed-Abdul S.	PLoS One. 2020 Jun 5;15(6):e0233976. doi: 10.1371/journal.pone.0233976. eCollection 2020.	PLoS One	2020	2020-06-06	Study	10.1371/journal.pone.0233976	Kidney transplant	Predict need for renal replacement therapy based on other ICD-9 diagnoses		X							X									X	X											X	X	X	X	X		X	X
Training and Validation of Deep Neural Networks for the Prediction of 90-Day Post-Liver Transplant Mortality Using UNOS Registry Data	Ershoff BD, Lee CK, Wray CL, Agopian VG, Urban G, Baldi P, Cannesson M.	Transplant Proc. 2020 Jan-Feb;52(1):246-258. doi: 10.1016/j.transproceed.2019.10.019. Epub 2020 Jan 8.	Transplant Proc	2020	2020-01-14	Study	10.1016/j.transproceed.2019.10.019	Liver Transplant	Predicting mortality after liver transplanation		X											X	X				X	X	X
[Volume Measurements of Post-transplanted Liver of Pediatric Recipients Using Workstations and Deep Learning]	Esaki T, Furukawa R.	Nihon Hoshasen Gijutsu Gakkai Zasshi. 2020;76(11):1133-1142. doi: 10.6009/jjrt.2020_JSRT_76.11.1133.	Nihon Hoshasen Gijutsu Gakkai Zasshi	2020	2020-11-24	Not in English	10.6009/jjrt.2020_JSRT_76.11.1133	Liver Transplant	Predicting liver and spleen segmentation from digital images																														X
Predictors of Survival After Liver Transplantation in Patients With the Highest Acuity (MELD ≥40)	Evans MD, Diaz J, Adamusiak AM, Pruett TL, Kirchner VA, Kandaswamy R, Humphreville VR, Leventhal TM, Grosland JO, Vock DM, Matas AJ, Chinnakotla S.	Ann Surg. 2020 Sep 1;272(3):458-466. doi: 10.1097/SLA.0000000000004211.	Ann Surg	2020	2020-08-03	Study	10.1097/SLA.0000000000004211	Liver Transplant	Predicting survival after transplant		X													X																		X
Molecular T-cell‒mediated rejection in transbronchial and mucosal lung transplant biopsies is associated with future risk of graft loss	Halloran K, Parkes MD, Timofte I, Snell G, Westall G, Havlin J, Lischke R, Hachem R, Kreisel D, Levine D, Kubisa B, Piotrowska M, Juvet S, Keshavjee S, Jaksch P, Klepetko W, Hirji A, Weinkauf J, Halloran PF.	J Heart Lung Transplant. 2020 Dec;39(12):1327-1337. doi: 10.1016/j.healun.2020.08.013. Epub 2020 Aug 26.	J Heart Lung Transplant	2020	2020-09-18	Study	10.1016/j.healun.2020.08.013	Lung Transplant	Predicting T-Cell Mediated Rejection (graft loss 1 yr post tx)		X																								X							X
Molecular phenotyping of rejection-related changes in mucosal biopsies from lung transplants	Halloran K, Parkes MD, Timofte IL, Snell GI, Westall GP, Hachem R, Kreisel D, Levine D, Juvet S, Keshavjee S, Jaksch P, Klepetko W, Hirji A, Weinkauf J, Halloran PF.	Am J Transplant. 2020 Apr;20(4):954-966. doi: 10.1111/ajt.15685. Epub 2019 Dec 1.	Am J Transplant	2020	2019-11-04	Study	10.1111/ajt.15685	Lung Transplant	Assessing lung transplant rejection from mucosal biopsy instead of transbrochial biopsy		X																								X							X					X
Heart Transplantation: An In-Depth Survival Analysis	Hsich EM, Blackstone EH, Thuita LW, McNamara DM, Rogers JG, Yancy CW, Goldberg LR, Valapour M, Xu G, Ishwaran H.	JACC Heart Fail. 2020 Jul;8(7):557-568. doi: 10.1016/j.jchf.2020.03.014. Epub 2020 Jun 10.	JACC Heart Fail	2020	2020-06-15	Study	10.1016/j.jchf.2020.03.014	Heart transplant	Predicting mortality after heart transplant	X	X																								X							X
Fuzzy logic-based clinical decision support system for the evaluation of renal function in post-Transplant Patients	Improta G, Mazzella V, Vecchione D, Santini S, Triassi M.	J Eval Clin Pract. 2020 Aug;26(4):1224-1234. doi: 10.1111/jep.13302. Epub 2019 Nov 12.	J Eval Clin Pract	2020	2019-11-13	Study	10.1111/jep.13302	Kidney transplant	Predicting GFR and Proteinuria		X															X													X
Survival prediction models since liver transplantation - comparisons between Cox models and machine learning techniques	Kantidakis G, Putter H, Lancia C, Boer J, Braat AE, Fiocco M.	BMC Med Res Methodol. 2020 Nov 16;20(1):277. doi: 10.1186/s12874-020-01153-1.	BMC Med Res Methodol	2020	2020-11-17	Study	10.1186/s12874-020-01153-1	Liver Transplant	Predicting survival after transplant						X									X	X														X			X		X
Comparison of semi-automatic and deep learning-based automatic methods for liver segmentation in living liver transplant donors	Kavur AE, Gezer NS, Barış M, Şahin Y, Özkan S, Baydar B, Yüksel U, Kılıkçıer Ç, Olut Ş, Bozdağı Akar G, Ünal G, Dicle O, Selver MA.	Diagn Interv Radiol. 2020 Jan;26(1):11-21. doi: 10.5152/dir.2019.19025.	Diagn Interv Radiol	2020	2020-01-07	Study	10.5152/dir.2019.19025	Liver Transplant	Predict liver volume and segmentation		X																							X					X
Personalized prediction of delayed graft function for recipients of deceased donor kidney transplants with machine learning	Kawakita S, Beaumont JL, Jucaud V, Everly MJ.	Sci Rep. 2020 Oct 27;10(1):18409. doi: 10.1038/s41598-020-75473-z.	Sci Rep	2020	2020-10-28	Study	10.1038/s41598-020-75473-z	Kidney Transplant	Predicting DGF						X	X						X			X								X					X	X	X		X			X
A simple four-factor preoperative recipient scoring model for prediction of 90-day mortality after adult liver Transplantation:A retrospective cohort study	Kong L, Lv T, Jiang L, Yang J, Yang J.	Int J Surg. 2020 Sep;81:26-31. doi: 10.1016/j.ijsu.2020.07.021. Epub 2020 Jul 29.	Int J Surg	2020	2020-08-02	Study	10.1016/j.ijsu.2020.07.021	Liver Transplant	Predicting post-op survival		X							X				X		X															X						X
Random forest analysis identifies change in serum creatinine and listing status as the most predictive variables of an outcome for young children on liver transplant waitlist	Kulkarni S, Chi L, Goss C, Lian Q, Nadler M, Stoll J, Doyle M, Turmelle Y, Khan A.	Pediatr Transplant. 2020 Nov 24:e13932. doi: 10.1111/petr.13932. Online ahead of print.	Pediatr Transplant	2020	2020-11-24	Study	10.1111/petr.13932	Liver Transplant	Predicting outcome at time of listing		X	X															X	X														X
Extremes of Age Decrease Survival in Adults After Lung Transplant	Lehr CJ, Blackstone EH, McCurry KR, Thuita L, Tsuang WM, Valapour M.	Chest. 2020 Apr;157(4):907-915. doi: 10.1016/j.chest.2019.06.042. Epub 2019 Aug 13.	Chest	2020	2019-08-17	Study	10.1016/j.chest.2019.06.042	Lung Transplant	Mortality		X																								X							X
Discovery and validation of a novel blood-based molecular biomarker of rejection following liver transplantation	Levitsky J, Asrani SK, Schiano T, Moss A, Chavin K, Miller C, Guo K, Zhao L, Kandpal M, Bridges N, Brown M, Armstrong B, Kurian S, Demetris AJ, Abecassis M; Clinical Trials in Organ Transplantation - 14 Consortium.	Am J Transplant. 2020 Aug;20(8):2173-2183. doi: 10.1111/ajt.15953. Epub 2020 May 25.	Am J Transplant	2020	2020-05-02	Study	10.1111/ajt.15953	Liver Transplant	Predicting rejection		X															X	X	X			X	X										X
Evaluation of the Classification Accuracy of the Kidney Biopsy Direct Immunofluorescence through Convolutional Neural Networks	Ligabue G, Pollastri F, Fontana F, Leonelli M, Furci L, Giovanella S, Alfano G, Cappelli G, Testa F, Bolelli F, Grana C, Magistroni R.	Clin J Am Soc Nephrol. 2020 Oct 7;15(10):1445-1454. doi: 10.2215/CJN.03210320. Epub 2020 Sep 16.	Clin J Am Soc Nephrol	2020	2020-09-17	Study	10.2215/CJN.03210320	Kidney transplant	Kidney biopsy evaluation												X					X												X	X
Predicting Short-term Survival after Liver Transplantation using Machine Learning	Liu CL, Soong RS, Lee WC, Jiang GW, Lin YC.	Sci Rep. 2020 Mar 27;10(1):5654. doi: 10.1038/s41598-020-62387-z.	Sci Rep	2020	2020-03-30	Study	10.1038/s41598-020-62387-z	Liver Transplant	Predicting mortality after liver transplanation									X								X	X	X														X
Machine learning for the prediction of severe pneumonia during posttransplant hospitalization in recipients of a deceased-donor kidney transplant	Luo Y, Tang Z, Hu X, Lu S, Miao B, Hong S, Bai H, Sun C, Qiu J, Liang H, Na N.	Ann Transl Med. 2020 Feb;8(4):82. doi: 10.21037/atm.2020.01.09.	Ann Transl Med	2020	2020-03-17	Study	10.21037/atm.2020.01.09	Kidney transplant	prediction of severe pneumonia during posttransplant hospitalization in recipients of a deceased-donor kidney transplant		X							X				X					X	X										X				X	X		X			X	X
Identifying scenarios of benefit or harm from kidney transplantation during the COVID-19 pandemic: A stochastic simulation and machine learning study	Massie AB, Boyarsky BJ, Werbel WA, Bae S, Chow EKH, Avery RK, Durand CM, Desai N, Brennan D, Garonzik-Wang JM, Segev DL.	Am J Transplant. 2020 Nov;20(11):2997-3007. doi: 10.1111/ajt.16117. Epub 2020 Jul 15.	Am J Transplant	2020	2020-06-10	Study	10.1111/ajt.16117	Kidney transplant	Predicting benefit of kidney transplant during Covid-19			X																							X						X
Novel Model to Predict HCC Recurrence after Liver Transplantation Obtained Using Deep Learning: A Multicenter Study	Nam JY, Lee JH, Bae J, Chang Y, Cho Y, Sinn DH, Kim BH, Kim SH, Yi NJ, Lee KW, Kim JM, Park JW, Kim YJ, Yoon JH, Joh JW, Suh KS.	Cancers (Basel). 2020 Sep 29;12(10):2791. doi: 10.3390/cancers12102791.	Cancers (Basel)	2020	2020-10-02	Study	10.3390/cancers12102791	Liver Transplant	Predicting cancer reoccurance post-transplant						X									X			X	X											X
The study of the association between immune monitoring and pneumonia in kidney transplant recipients through machine learning models	Peng B, Gong H, Tian H, Zhuang Q, Li J, Cheng K, Ming Y.	J Transl Med. 2020 Sep 29;18(1):370. doi: 10.1186/s12967-020-02542-2.	J Transl Med	2020	2020-09-30	Study	10.1186/s12967-020-02542-2	Kidney transplant	Prediction of pneumonia and pneumonia prognosis (mild vs severe)		X											X					X	X			X	X							X			X	X		X
Peripheral Blood RNA Sequencing Unravels a Differential Signature of Coding and Noncoding Genes by Types of Kidney Allograft Rejection	Pineda S, Sur S, Sigdel T, Nguyen M, Crespo E, Torija A, Meneghini M, Gomà M, Sirota M, Bestard O, Sarwal MM.	Kidney Int Rep. 2020 Jul 26;5(10):1706-1721. doi: 10.1016/j.ekir.2020.07.023. eCollection 2020 Oct.	Kidney Int Rep	2020	2020-10-26	Study	10.1016/j.ekir.2020.07.023	Kidney transplant	Predicting kidney rejection w/ RNA								X																		X				X
Can donor narratives yield insights? A natural language processing proof of concept to facilitate kidney allocation	Placona AM, Martinez C, McGehee H, Carrico B, Klassen DK, Stewart D.	Am J Transplant. 2020 Apr;20(4):1095-1104. doi: 10.1111/ajt.15705. Epub 2019 Dec 12.	Am J Transplant	2020	2019-11-19	Study	10.1111/ajt.15705	Kidney Transplant	predict delay or discard of deceased donor kidney from donor free text data								X					X		X			X	X			X
Fully automated quantitative assessment of hepatic steatosis in liver transplants	Salvi M, Molinaro L, Metovic J, Patrono D, Romagnoli R, Papotti M, Molinari F.	Comput Biol Med. 2020 Aug;123:103836. doi: 10.1016/j.compbiomed.2020.103836. Epub 2020 May 29.	Comput Biol Med	2020	2020-07-14	Study	10.1016/j.compbiomed.2020.103836	Liver Transplant	Evaluating liver suitability for transplant												X					X												X	X
Patient Survival After Kidney Transplantation: Important Role of Graft-sustaining Factors as Determined by Predictive Modeling Using Random Survival Forest Analysis	Scheffner I, Gietzelt M, Abeling T, Marschollek M, Gwinner W.	Transplantation. 2020 May;104(5):1095-1107. doi: 10.1097/TP.0000000000002922.	Transplantation	2020	2019-08-13	Study	10.1097/TP.0000000000002922	Kidney transplant	Predicting survival after transplant		X													X
Development and testing of an artificial intelligence tool for predicting end stage kidney disease in patients with immunoglobulin A nephropathy	Schena FP, Anelli VW, Trotta J, Di Noia T, Manno C, Tripepi G, D'Arrigo G, Chesnaye NC, Russo ML, Stangou M, Papagianni A, Zoccali C, Tesar V, Coppo R.	Kidney Int. 2020 Sep 1:S0085-2538(20)30969-8. doi: 10.1016/j.kint.2020.07.046. Online ahead of print.	Kidney Int	2020	2020-09-05	Study	10.1016/j.kint.2020.07.046	Kidney ESRD	Predicting ESRD		X							X				X		X			X		X										X
Machine learning algorithm for early detection of end-stage renal disease	Segal Z, Kalifa D, Radinsky K, Ehrenberg B, Elad G, Maor G, Lewis M, Tibi M, Korn L, Koren G.	BMC Nephrol. 2020 Nov 27;21(1):518. doi: 10.1186/s12882-020-02093-0.	BMC Nephrol	2020	2020-11-28	Study	10.1186/s12882-020-02093-0	Kidney ESRD	Predicting ESRD progression		X							X				X	X	X			X				X	X								X		X			X			X
Deep learning quantification of percent steatosis in donor liver biopsy frozen sections	Sun L, Marsh JN, Matlock MK, Chen L, Gaut JP, Brunt EM, Swamidass SJ, Liu TC.	EBioMedicine. 2020 Oct;60:103029. doi: 10.1016/j.ebiom.2020.103029. Epub 2020 Sep 24.	EBioMedicine	2020	2020-09-27	Study	10.1016/j.ebiom.2020.103029	Liver Transplant	Evaluating liver suitability for transplant		X																											X
The rise and fall of the model for end-stage liver disease score and the need for an optimized machine learning approach for liver allocation	Vagefi PA, Bertsimas D, Hirose R, Trichakis N.	Curr Opin Organ Transplant. 2020 Apr;25(2):122-125. doi: 10.1097/MOT.0000000000000734.	Curr Opin Organ Transplant	2020	2020-02-20	Study	10.1097/MOT.0000000000000734	Liver Transplant	Replacement for MELD, predicting mortality or ineligibility for transplant in the next three months						X							X											X								X
Patterns of 1,748 Unique Human Alloimmune Responses Seen by Simple Machine Learning Algorithms	Vittoraki AG, Fylaktou A, Tarassi K, Tsinaris Z, Petasis GC, Gerogiannis D, Kheav VD, Carmagnat M, Lehmann C, Doxiadis I, Iniotaki AG, Theodorou I.	Front Immunol. 2020 Jul 28;11:1667. doi: 10.3389/fimmu.2020.01667. eCollection 2020.	Front Immunol	2020	2020-08-28	Study	10.3389/fimmu.2020.01667	Kidney transplant	Identifying alloimmune response		X						X																		X
Development of Phenotyping Algorithms for the Identification of Organ Transplant Recipients: Cohort Study	Wheless L, Baker L, Edwards L, Anand N, Birdwell K, Hanlon A, Chren MM.	JMIR Med Inform. 2020 Dec 10;8(12):e18001. doi: 10.2196/18001.	JMIR Med Inform	2020	2020-11-06	Study	10.2196/18001	Solid Organ Transplant	Identifying organ transplant patients		X							X									X				X									X	X	X
Tacrolimus Exposure Prediction Using Machine Learning	Woillard JB, Labriffe M, Debord J, Marquet P.	Clin Pharmacol Ther. 2020 Nov 30. doi: 10.1002/cpt.2123. Online ahead of print.	Clin Pharmacol Ther	2020	2020-11-30	Study	10.1002/cpt.2123	Solid Organ Transplant, primarily Kidney pts	Tacrolimus dosing	X	X																								X			X		X
Evaluation of Glomerular Filtration Rate in Chronic Kidney Disease by Radial Basis Function Neural Network	Xu J, Guo B, Liu C.	Transplant Proc. 2020 Apr;52(3):748-753. doi: 10.1016/j.transproceed.2020.01.008. Epub 2020 Mar 19.	Transplant Proc	2020	2020-03-23	Study	10.1016/j.transproceed.2020.01.008	Kidney transplant	Estimating GFR		X							X								X	X												X
Deregulation of the Purine Pathway in Pre-Transplant Liver Biopsies Is Associated with Graft Function and Survival after Transplantation	Xu J, Hassan-Ally M, Casas-Ferreira AM, Suvitaival T, Ma Y, Vilca-Melendez H, Rela M, Heaton N, Wayel J, Legido-Quigley C.	J Clin Med. 2020 Mar 5;9(3):711. doi: 10.3390/jcm9030711.	J Clin Med	2020	2020-03-11	Study	10.3390/jcm9030711	Liver Transplant	predicting graft function and survival	X	X															X	X											X				X
Identifying Modifiable Predictors of Long-Term Survival in Liver Transplant Recipients With Diabetes Mellitus Using Machine Learning	Yasodhara A, Dong V, Azhie A, Goldenberg A, Bhat M.	Liver Transpl. 2020 Oct 28. doi: 10.1002/lt.25930. Online ahead of print.	Liver Transpl	2020	2020-10-28	Study	10.1002/lt.25930	Liver Transplant	Predicting impact of diabetes mellitus on survival		X	X												X																X
Predicting Kidney Discard Using Machine Learning	Barah M, Mehrotra S.	Transplantation. 2021 Jan 8. doi: 10.1097/TP.0000000000003620. Online ahead of print.	Transplantation	2021	2021-02-03	Study	10.1097/TP.0000000000003620	Kidney transplant	Predicting discard		X				X			X				X				X			X	X												X			X			X
Chronic lung allograft dysfunction small airways reveal a lymphocytic inflammation gene signature	Dugger DT, Fung M, Hays SR, Singer JP, Kleinhenz ME, Leard LE, Golden JA, Shah RJ, Lee JS, Deiter F, Greenland NY, Jones KD, Langelier CR, Greenland JR.	Am J Transplant. 2021 Jan;21(1):362-371. doi: 10.1111/ajt.16293. Epub 2020 Sep 22.	Am J Transplant	2021	2020-09-05	Study	10.1111/ajt.16293	Lung Transplant	Predicting Chronic lung allograft dysfunction from airway brushes		X											X																						X
CMV viral load kinetics as surrogate endpoints after allogeneic transplantation	Duke ER, Williamson BD, Borate B, Golob JL, Wychera C, Stevens-Ayers T, Huang ML, Cossrow N, Wan H, Mast TC, Marks MA, Flowers ME, Jerome KR, Corey L, Gilbert PB, Schiffer JT, Boeckh M.	J Clin Invest. 2021 Jan 4;131(1):e133960. doi: 10.1172/JCI133960.	J Clin Invest	2021	2020-09-24	Study	10.1172/JCI133960	Transplant	Predicting CMV		X											X
Identifying key predictors of mortality in young patients on chronic haemodialysis-a machine learning approach	Gotta V, Tancev G, Marsenic O, Vogt JE, Pfister M.	Nephrol Dial Transplant. 2021 Feb 20;36(3):519-528. doi: 10.1093/ndt/gfaa128.	Nephrol Dial Transplant	2021	2020-06-09	Study	10.1093/ndt/gfaa128	Kidney transplant	Predicting mortality in pediatric dialysis patients		X	X										X				X																X
Automated En Masse Machine Learning Model Generation Shows Comparable Performance as Classic Regression Models for Predicting Delayed Graft Function in Renal Allografts	Jen KY, Albahra S, Yen F, Sageshima J, Chen LX, Tran N, Rashidi HH.	Transplantation. 2021 Feb 4. doi: 10.1097/TP.0000000000003640. Online ahead of print.	Transplantation	2021	2021-02-09	Study	10.1097/TP.0000000000003640	Kidney transplant	Predicting DGF		X											X				X	X	X				X							X	X		X	X			X			X
Prediction of Postoperative Complications for Patients of End Stage Renal Disease	Jeong YS, Kim J, Kim D, Woo J, Kim MG, Choi HW, Kang AR, Park SY.	Sensors (Basel). 2021 Jan 14;21(2):544. doi: 10.3390/s21020544.	Sensors (Basel)	2021	2021-01-20	Study	10.3390/s21020544	Kidney transplant	Predicting postop complications							X						X	X																X	X	X	X	X
Prediction of HLA-DQ in Deceased Donors and its Clinical Significance in Kidney Transplantation	Kim SK, Yang JJ, Hwang SH, Sung H, Shin S, Ko SY, Oh HB.	Ann Lab Med. 2021 Mar 1;41(2):190-197. doi: 10.3343/alm.2021.41.2.190.	Ann Lab Med	2021	2020-10-16	Study	10.3343/alm.2021.41.2.190	Kidney transplant	Predicting Donor HLA-DQ type (when genotyping is not possible)		X						X									X	X	X										X	X
Dynamics of Systemic Inflammation as a Function of Developmental Stage in Pediatric Acute Liver Failure	Vodovotz Y, Barclay D, Yin J, Squires RH, Zamora R.	Front Immunol. 2021 Jan 15;11:610861. doi: 10.3389/fimmu.2020.610861. eCollection 2020.	Front Immunol	2021	2021-02-01	Study	10.3389/fimmu.2020.610861	Liver Transplant	Prediction of Acute Liver Failure		X											X																X
Cox-nnet v2.0: improved neural-network based survival prediction extended to large-scale EMR data	Wang D, Jing Z, He K, Garmire LX.	Bioinformatics. 2021 Jan 30:btab046. doi: 10.1093/bioinformatics/btab046. Online ahead of print.	Bioinformatics	2021	2021-01-30	Study	10.1093/bioinformatics/btab046	Kidney Transplant	Predicting mortality												X			X
Mycophenolic acid exposure prediction using machine learning	Woillard JB, Labriffe M, Debord J, Marquet P.	Clin Pharmacol Ther. 2021 Feb 24. doi: 10.1002/cpt.2216. Online ahead of print.	Clin Pharmacol Ther	2021	2021-02-24	Study	10.1002/cpt.2216	Transplant (mostly kidney)	Predicting MPA AUC	X																										X	X	X		X
[truncated: 3 more columns]

## Sheet: Screening Pivot
Count of Include	Column Labels
	N				N Total	Y	Y Total	(blank)	(blank) Total	Grand Total
Row Labels	Full Text	Screening	Title	Title		na		(blank)
Basic Science	1				1					1
Clinical Guidelines	1				1					1
Editorial	13		10		23					23
Meeting				1	1					1
Meeting Report			3		3					3
Not a Study	1				1					1
Not AI	8		6		14					14
Not Available	3				3					3
Not English			1		1					1
Not in Humans	2		25		27					27
Not Transplant	36		263		299					299
Orig Pub 2018		1			1					1
Protocol	1				1					1
Review						20	20			20
Study						54	54			54
(blank)
Grand Total	66	1	308	1	376	74	74			450
